# Supplementary material
Source: HighWire-hosted journal article supplement (http://www.cmaj.ca/highwire/filestream/58939/field_highwire_adjunct_files/4/advice-garland-5-at.pdf)
Supplement: advice-garland-5-at.pdf [file advice-garland-5-at.pdf]

**APPENDIX 5 (as supplied by the authors): Characteristics of cases and controls used for analysis of 90 day mortality**

|                                                 | Cases          | Controls       | p-value  |
|-------------------------------------------------|----------------|----------------|----------|
| Number                                          | 44,837         | 184,210        |          |
| Males, # (%)                                    | 23,919 (53.3)  | 92,730 (50.3)  | <.0001 * |
| Age, mean (SD)                                  | 72.2 (13.1)    | 70.3 (13.5)    | <.001 *  |
| Left Against Medical Advice (AMA), # (%)        | 620 (1.38)     | 1,093 (0.59)   | <.0001   |
| Any AMA discharges in prior 5 years, #, (%)     | 223 (0.50)     | 1,246 (0.68)   | <.0001   |
| Hospitalizations in prior 5 years, mean (SD)    | 1.0 (0.9)      | 1.4 (2.3)      | <.001    |
| Median (interquartile range)                    | 1 (0-1)        | 1 (0-2)        |          |
| <i>Average household income quintile, # (%)</i> |                |                | <.0001   |
| Urban 1 (lowest urban stratum)                  | 6,392 (14.26)  | 25,957 (14.09) |          |
| Urban 2                                         | 4,976 (11.10)  | 22,136 (12.02) |          |
| Urban 3                                         | 4,351 (9.70)   | 20,842 (11.31) |          |
| Urban 4                                         | 3,077 (6.86)   | 15,833 (8.60)  |          |
| Urban 5 (highest urban stratum)                 | 2,812 (6.27)   | 15,000 (8.14)  |          |
| Rural 1 (lowest rural stratum)                  | 4,297 (9.58)   | 15,871 (8.62)  |          |
| Rural 2                                         | 4,904 (10.94)  | 18,248 (9.91)  |          |
| Rural 3                                         | 4,399 (9.81)   | 17,893 (9.71)  |          |
| Rural 4                                         | 3,336 (7.44)   | 14,119 (7.66)  |          |
| Rural 5 (highest rural stratum)                 | 2,352 (5.25)   | 10,550 (5.73)  |          |
| Not Calculated                                  | 3,941 (8.79)   | 7,761 (4.21)   |          |
| <i>Year of hospitalization</i>                  |                |                | <.0001 * |
| 1990-1993                                       | 9,682 (21.59)  | 42,440 (23.04) |          |
| 1994-1998                                       | 12,191 (27.19) | 49,312 (26.77) |          |
| 1999-2003                                       | 11,669 (26.03) | 46,219 (25.09) |          |
| 2004-2009 (reference)                           | 11,295 (25.19) | 46,239 (25.10) |          |
| <i>Comorbid conditions, # (%)</i>               |                |                |          |
| Metastatic cancer                               | 12,005 (26.77) | 6,299 (3.42)   | <.0001   |
| Congestive heart failure                        | 11,916 (26.58) | 19,246 (10.45) | <.0001   |
| Diabetes                                        | 9,548 (21.29)  | 23,880 (12.96) | <.0001   |
| Chronic pulmonary disease                       | 8,642 (19.27)  | 17,788 (9.66)  | <.0001   |
| Hypertension, uncomplicated                     | 8,550 (19.07)  | 35,276 (19.15) | 0.7      |
| Arrhythmia                                      | 7,636 (17.03)  | 20,942 (11.37) | <.0001   |
| Fluid and electrolyte disorders                 | 5,867 (13.09)  | 7,846 (4.26)   | <.0001   |
| Solid tumor without metastasis                  | 5,441 (12.14)  | 13,095 (7.11)  | <.0001   |
| Renal failure                                   | 4,500 (10.04)  | 4,686 (2.54)   | <.0001   |
| Other neurologic disorders                      | 3,053 (6.81)   | 6,753 (3.67)   | <.0001   |
| Peripheral vascular disease                     | 2,899 (6.47)   | 6,439 (3.50)   | <.0001   |
| Depression                                      | 2,508 (5.59)   | 6,339 (3.44)   | <.0001   |
| Alcohol abuse                                   | 1,948 (4.34)   | 5,030 (2.73)   | <.0001   |
| Valvular heart disease                          | 1,939 (4.32)   | 3,953 (2.15)   | <.0001   |
| Hypertension, complicated                       | 1,916 (4.27)   | 3,050 (1.66)   | <.0001   |
| Deficiency anemia                               | 1,802 (4.02)   | 3,087 (1.68)   | <.0001   |
| Hypothyroidism                                  | 1,792 (4.00)   | 4,990 (2.71)   | <.0001   |
| Liver disease                                   | 1,692 (3.77)   | 1,758 (0.95)   | <.0001   |
| Lymphoma                                        | 1,652 (3.68)   | 1,353 (0.73)   | <.0001   |
| Psychoses                                       | 1,625 (3.62)   | 4,303 (2.34)   | <.0001   |
| Paralysis                                       | 1,127 (2.51)   | 2,695 (1.46)   | <.0001   |

|                                                |              |              |        |
|------------------------------------------------|--------------|--------------|--------|
| Rheumatoid arthritis/collagen-vascular disease | 1,120 (2.50) | 2,929 (1.59) | <.0001 |
| Pulmonary circulation disorders                | 1,115 (2.49) | 1,689 (0.92) | <.0001 |
| Coagulopathy                                   | 959 (2.14)   | 1,286 (0.70) | <.0001 |
| Weight loss                                    | 859 (1.92)   | 1,031 (0.56) | <.0001 |
| Blood loss anemia                              | 715 (1.59)   | 1,066 (0.58) | <.0001 |
| Obesity                                        | 593 (1.32)   | 2,218 (1.20) | 0.04   |
| Peptic ulcer disease w/o bleeding              | 580 (1.29)   | 1,367 (0.74) | <.0001 |
| Drug abuse                                     | 437 (0.97)   | 945 (0.51)   | <.0001 |
| AIDS/HIV                                       | 136 (0.30)   | 44 (0.02)    | <.0001 |

\*These parameters are not identical between cases and controls despite matching due to variable numbers of controls per case

## APPENDIX 6

Full results of the conditional logistic regression model for 90-day mortality.

| <i>Variable</i>                                | <i>Odds ratio*</i> | <i>95% C.I.</i> |
|------------------------------------------------|--------------------|-----------------|
| Left AMA from index hospitalization            | 2.511              | 2.183, 2.887    |
| Any AMA discharges in prior 5 years            | 0.815              | 0.660, 1.007    |
| Number of hospitalizations in prior 5 years    | 0.685              | 0.678, 0.693    |
| <i>Average household income quintile</i>       |                    |                 |
| Urban 1 (lowest urban stratum) [reference]     | --                 | --              |
| Urban 2                                        | 0.948              | 0.899, 0.999    |
| Urban 3                                        | 0.886              | 0.839, 0.936    |
| Urban 4                                        | 0.851              | 0.801, 0.904    |
| Urban 5 (highest urban stratum)                | 0.812              | 0.763, 0.865    |
| Rural 1 (lowest rural stratum)                 | 1.673              | 1.582, 1.769    |
| Rural 2                                        | 1.717              | 1.627, 1.812    |
| Rural 3                                        | 1.618              | 1.532, 1.710    |
| Rural 4                                        | 1.498              | 1.411, 1.590    |
| Rural 5 (highest rural stratum)                | 1.226              | 1.146, 1.312    |
| Not calculated                                 | 2.243              | 2.111, 2.384    |
| <i>Year of hospitalization</i>                 |                    |                 |
| 1990-1993                                      | 0.312              | 0.189, 0.515    |
| 1994-1998                                      | 0.508              | 0.336, 0.768    |
| 1999-2003                                      | 0.800              | 0.599, 1.068    |
| 2004-2009 (reference)                          | --                 | --              |
| <i>Comorbid conditions</i>                     |                    |                 |
| Metastatic cancer                              | 26.993             | 25.815, 28.225  |
| AIDS/HIV                                       | 17.729             | 11.773, 26.700  |
| Lymphoma                                       | 10.470             | 9.522, 11.514   |
| Liver disease                                  | 4.513              | 4.109, 4.957    |
| Solid tumor without metastasis                 | 4.144              | 3.972, 4.324    |
| Renal failure                                  | 3.404              | 3.193, 3.630    |
| Congestive heart failure                       | 3.191              | 3.073, 3.314    |
| Fluid and electrolyte disorders                | 2.399              | 2.287, 2.517    |
| Chronic pulmonary disease                      | 2.259              | 2.174, 2.348    |
| Coagulopathy                                   | 2.189              | 1.952, 2.454    |
| Weight loss                                    | 2.023              | 1.793, 2.282    |
| Other neurologic disorders                     | 1.967              | 1.857, 2.083    |
| Drug abuse                                     | 1.885              | 1.617, 2.198    |
| Rheumatoid arthritis/collagen-vascular disease | 1.865              | 1.705, 2.041    |
| Diabetes                                       | 1.863              | 1.796, 1.931    |
| Pulmonary circulation disorders                | 1.703              | 1.538, 1.886    |
| Peripheral vascular disease                    | 1.697              | 1.596, 1.803    |
| Blood loss anemia                              | 1.631              | 1.430, 1.860    |
| Peptic ulcer disease w/o bleeding              | 1.589              | 1.393, 1.813    |
| Depression                                     | 1.534              | 1.440, 1.634    |
| Deficiency anemia                              | 1.479              | 1.366, 1.601    |
| Valvular heart disease                         | 1.408              | 1.304, 1.521    |
| Paralysis                                      | 1.405              | 1.281, 1.541    |
| Psychoses                                      | 1.346              | 1.246, 1.453    |
| Alcohol abuse                                  | 1.298              | 1.203, 1.400    |
| Arrhythmia                                     | 1.190              | 1.143, 1.238    |
| Hypothyroidism                                 | 1.052              | 0.977, 1.131    |
| Obesity                                        | 0.866              | 0.769, 0.975    |

|                             |       |              |
|-----------------------------|-------|--------------|
| Hypertension, uncomplicated | 0.862 | 0.832, 0.893 |
| Hypertension, complicated   | 0.846 | 0.775, 0.924 |

AMA, left hospital against medical advice.

\* Odds ratios adjusted for: AMA discharge status, year of index hospitalization, comorbid conditions, average household income, the number of hospitalizations in the five years prior to the index hospitalization, and the existence of any AMA discharges in the five years prior to the index hospitalization. In addition exact matching occurred on age and sex.
